# 1 The spectral sensitivity of *Drosophila* photoreceptors

2

3 Camilla R. Sharkey<sup>1\*</sup>, Jorge Blanco<sup>1</sup>, Maya M. Leibowitz<sup>2</sup>, Daniel Pinto-Benito<sup>2</sup>, Trevor J.

4 Wardill<sup>1\*</sup>

5

6 <sup>1</sup> Department of Ecology, Evolution and Behavior, University of Minnesota, St. Paul, MN 55108,

7 US

8 <sup>2</sup> Department of Physiology, Development and Neuroscience, Cambridge University, CB2 3EG,

9 UK

10

11 \*Corresponding authors: [camilla.r.sharkey@gmail.com](mailto:camilla.r.sharkey@gmail.com) & [twardill@umn.edu](mailto:twardill@umn.edu)

12

## 13 Abstract

14

15 *Drosophila melanogaster* has long been a popular model insect species, due in large part to  
16 the availability of genetic tools and is fast becoming the model for insect colour vision. Key  
17 to understanding colour reception in *Drosophila* is in-depth knowledge of spectral inputs  
18 and downstream neural processing. While recent studies have sparked renewed interest in  
19 colour processing in *Drosophila*, photoreceptor spectral sensitivity measurements have yet  
20 to be carried out *in vivo*. We have fully characterised the spectral input to the motion and  
21 colour vision pathways, and directly measured the effects of spectral modulating factors,  
22 screening pigment density and carotenoid-based ocular pigments. All receptor sensitivities  
23 had significant shifts in spectral sensitivity compared to previous measurements. Notably,  
24 the spectral range of the Rh6 visual pigment is substantially broadened and its peak  
25 sensitivity is shifted by 92 nm from 508 to 600 nm. We propose that this deviation can be  
26 explained by transmission of long wavelengths through the red screening pigment and by  
27 the presence of the blue-absorbing filter in the R7y receptors. Further, we tested direct  
28 interactions between photoreceptors and found evidence of interactions between inner and  
29 outer receptors, in agreement with previous findings of cross-modulation between receptor  
30 outputs in the lamina.

## 31 Introduction

32

33 Colour cues in the natural environment are used by many insects, guiding behaviours such  
34 as prey detection, mate selection and more general tasks such as flight navigation. To detect  
35 and distinguish wavelength cues, the output of two or more photoreceptors with different  
36 spectral sensitivities must be compared. This colour-opponency system has been well  
37 explored in vertebrates but only more recently have insect colour opponent neurons been  
38 characterised, using *Drosophila* as the model<sup>1,2</sup>. *Drosophila melanogaster* is fast becoming  
39 the model for insect colour vision due to the wide range of genetic tools available.  
40 Surprisingly, despite new advances in our understanding of more complex motion and  
41 colour visual processing in *Drosophila*, the characterisation of spectral sensitivity in this  
42 species has not been investigated since it was first revealed 20 years ago<sup>3,4</sup>.

43

44 The *Drosophila* compound eye is formed from approximately 800 ommatidial units, each  
45 comprising 6 outer (R1 - 6) and 2 inner photoreceptors (R7 and R8) with an open rhabdom  
46 structure (**Fig. 1a**). Sensitivity of the photoreceptors is largely determined by the underlying  
47 visual pigment and ommatidia can be subdivided into two major classes, 'pale' (p) or  
48 'yellow' (y), owing to their appearance under the microscope, with the latter possessing a  
49 blue-absorbing yellow filter in the R7y receptor alongside the UV-sensitive Rh4 visual  
50 pigment<sup>5</sup>. In the outer receptors of all ommatidia, opsin Rh1 confers broadband blue-green  
51 sensitivity (478 nm) with an additional peak in the UV due to an associated carotenoid-  
52 derived sensitising pigment<sup>4,6</sup>. Inner receptor R7 cells express UV-sensitive Rh3 (R7p) or Rh4  
53 (R7y) and the proximal receptor R8 cells express either blue-sensitive Rh5 (R8p) or green-  
54 sensitive Rh6 (R8y)<sup>3,4</sup>. Direct intracellular recordings of the inner photoreceptors have not  
55 been possible due to their small size and stochastic distribution across the retina. Instead,  
56 peak sensitivities for Rh3 – Rh6 have been estimated from microspectrophotometry (MSP),  
57 visual pigment extracts and electroretinography (ERG) with ectopic expression of inner  
58 receptor opsin in the more numerous outer receptors, using white-eyed *Drosophila*<sup>3,4</sup>.  
59 Although this enabled the underlying visual pigment sensitivities to be measured (Rh3 –  
60 Rh6: 345, 375, 437, 508 nm; **Fig. 1b**), these studies were unable to quantify the sensitivity of

61 each when measured *in vivo*, in the photoreceptor cells where the opsins are normally  
62 expressed along with their naturally associated ocular screening pigment and photoreceptor  
63 filtering pigments (Fig. 1 c, d and e).

64

65 The spectral sensitivity of a cell is not dictated solely by the underlying visual pigment but is  
66 shaped also by numerous optical filters, including screening pigment that optically isolates  
67 neighbouring ommatidia and is located in the primary and secondary pigment cells (Fig. 1c).  
68 Pupillary pigment is also present in the soma of the photoreceptors and modulates light  
69 input to the rhabdom. In addition to this, dipteran flies have carotenoid-based pigments: a  
70 sensitising pigment that contributes additional sensitivity in the UV through energy transfer  
71 to the visual pigment (Rh1; Fig. 1c) and a blue-absorbing yellow filter in the R7y cells<sup>5</sup> (Fig  
72 1.d and e). *Drosophila* screening pigment absorbance peaks at 525 nm and becomes more  
73 transmissive at longer wavelengths (Fig. 1e), an adaptation thought to maximising the  
74 reconversion of Rh1 rhodopsin from its metarhodopsin, which peaks at 566 nm<sup>4,7</sup>. Early  
75 studies pointed towards a red receptor in dipterans<sup>8</sup>, later shown to be an artefact of long  
76 wavelength light leakage<sup>9</sup>. It has been argued that this red sensitivity may be of little  
77 consequence to the visual system of such flies when under ecologically-relevant levels of  
78 illumination<sup>9</sup>. Furthermore, it is thought that the wavelength peak of *Drosophila* Rh6 (508  
79 nm) is short-wavelength shifted when compared to flies with brown screening pigment (e.g.  
80 *Musca*, 520 nm), as an adaptation to reduce the absorption of red light. The effect of light  
81 leakage on the *Drosophila* Rh6 visual pigment has yet to be tested *in vivo*.

82

83 Much of what is understood about animal colour vision is derived from studies of  
84 vertebrates and only more recently have investigations revealed the neural basis of colour  
85 information processing in insects. Colour information processing in *Drosophila* has been  
86 investigated using behavioural experiments<sup>10,11</sup>, modelling<sup>12</sup> and by visualising neural  
87 responses directly in the fly brain, in response to light stimulation with genetic  
88 manipulation<sup>1,2</sup>. Colour opponency begins at the first visual synapse, the photoreceptor  
89 terminal, with reciprocal inhibition occurring between paired R7 and R8 receptors<sup>1</sup>.  
90 Additionally, there is transfer of information between inner and outer receptors *via* gap  
91 junctions in the lamina that is thought to enhance the sensitivity of the motion detection  
92 pathway<sup>13</sup>. However, it is not clear yet whether interactions do occur directly between inner

93 photoreceptors, as has been demonstrated in other insects<sup>14,15</sup> and whether opponency can  
94 be detected at the photoreceptor level.

95

96 Here we report the first complete *in vivo* characterisation of *Drosophila* spectral sensitivity,  
97 for each receptor type, by selectively restoring photoreceptor activity in flies with no  
98 receptor activity (*norpA*) and testing response using ERG. We characterise the sensitivity of  
99 photoreceptors flies with screening from distal receptors and ocular pigments intact and we  
100 test the effect of screening pigment and the blue-absorbing yellow filter on inner receptors.  
101 We reveal significant shifts in spectral sensitivity for all receptor sensitivities and a large 92  
102 nm shift in sensitivity of the Rh6 visual pigment when measured in its native photoreceptor  
103 (R8y) from 508 nm to 600 nm. We also find that the blue-absorbing yellow filter refines  
104 sensitivity of the Rh4 visual pigment in R7y photoreceptors. Furthermore, we explore the  
105 effect of reciprocal inhibition between inner photoreceptors on spectral response at the  
106 level of the photoreceptors and to what extent the outer photoreceptors input to this  
107 system. Our results indicate that the input from inner photoreceptors to downstream  
108 neuronal process is linear and provides no clear evidence for direct interactions at the  
109 photoreceptor level. Spectral modulation can be seen however between inner and outer  
110 receptors, providing further evidence of interactions between motion and spectral channels  
111 in the lamina.

112

113

## 114 Results

### 115 Single opsin rescues, Rh1, Rh3, Rh4, and Rh5

116

117 We generated flies with rescued activity of specific photoreceptor types (single opsin rescue  
118 flies) to test the spectral sensitivity of the inner R7p (Rh3), R8p (Rh5), R7y (Rh4), R8y (Rh6)  
119 and outer receptors (Rh1), using ERG. We were able to measure reliably from all single opsin  
120 rescue genotypes. Rh1 rescue flies exhibited characteristic on and off transients at the start  
121 and end of the 200 ms light pulse, absent in Rh3 – Rh6 (**Fig. 2**) rescue flies. The spectral  
122 responses of rescue flies Rh3, Rh4 and Rh5 with wild-type screening pigment had significant  
123 shifts in spectral sensitivity for portions of their detection range compared with previous  
124 characterisations (**Fig. 3**, black dashed traces). Sensitivities of Rh3 and Rh4 rescue flies were  
125 significantly short wave shifted from previous estimates, peaking at 330 and 355 nm,  
126 respectively (previous estimates: 345 and 375 nm). The peak sensitivity of the Rh5 rescue  
127 flies (435 nm) was similar compared to previous measurements of the visual pigment (437  
128 nm<sup>4</sup>) but the response had significantly boosted sensitivity in the ultraviolet range. The  
129 spectral sensitivity response of R1 - R6 (Rh1) was also significantly altered from a simple  
130 visual template. The red end of the spectrum was depressed and there were notably three  
131 fluctuations in the waveform around the peak (**Fig. 3**). Spectral curves from all four  
132 photoreceptor cell types were broader than predicted by a visual pigment template at peak  
133 sensitivity.

134

135 To test the effect of screening pigment on photoreceptor response, we examined opsin  
136 rescue flies with wild-type (red-eye) and reduced screening pigment (orange-eye). The  
137 spectral sensitivities of Rh3 and Rh4 single opsin rescue flies were not affected by a  
138 reduction of screening pigment. However, a reduction in screening pigment led to  
139 narrowing of the Rh5 rescue response (**Fig. 3**, orange traces) and a bathochromic (long-  
140 wave) shift in the peak sensitivity by 20 nm, from 435 nm to 455 nm. The spectral profile of  
141 Rh1 rescue flies shows the characteristic triple-peaked UV spectrum of the UV-sensitising  
142 pigment coupled with curve of the visual pigment peaking at 485 – 490 nm (**Fig. 3**, orange  
143 traces). Screening pigment reduction caused a shift in sensitivity towards the visual pigment  
144 peak, reducing the relative sensitivity in the UV region.

145

146 Dietary carotenoids were removed from the diet of red eye rescue flies to test for the  
147 presence of carotenoid pigments in the outer receptors (Rh1) and inner R7p (Rh3), R7y  
148 (Rh4) and R8p (Rh5) receptors. The response of the UV-sensitising pigment coupled to visual  
149 pigment Rh1 was effectively removed by carotenoid deprivation after one generation on  
150 yeast-glucose food and showed no further change in spectral shape after two generations  
151 (**Fig. 4**). Carotenoid deprivation had no effect on the spectral response of Rh3 opsin rescue  
152 flies but broadened the response in Rh4 rescue flies above 400 nm (**Fig. 4**). Responses were  
153 absent in Rh5 rescue flies when carotenoids were removed from the diet.

154

### 155 **Single opsin rescue Rh6**

156

157 In Rh6 single opsin rescue flies, where R8y activity was rescued, the spectral response was  
158 far broader than expected and considerably shifted in peak wavelength sensitivity from the  
159 previous estimate (508 nm) to 600 nm when the sensitivity was measured *in vivo* (**Fig. 5a**).  
160 This large bathochromic shift was reversed by 45 nm to 555 nm by the reduction of  
161 screening pigment in orange-eye flies. Sensitivity of white-eye mutants where screening  
162 pigment was absent and Rh6 was expressed in the outer receptors peaked close to the  
163 predicted peak wavelength of the visual pigment (508 nm), at 510 nm (**Fig. 5a**).

164

165 We aimed to test the effect of the carotenoid-based blue-absorbing yellow pigment on the  
166 sensitivity of Rh6 by means of carotenoid deprivation. When the yellow pigment was  
167 removed, two peaks of sensitivity could be seen, one at the peak sensitivity of Rh6 (508 nm)  
168 and the other close to the peak of the flies raised on regular carotenoid rich diet (600 nm)  
169 (**Fig. 5b**). There was no change in the shape of the spectral response between one and two  
170 generations of carotenoid deprivation (Supplementary Figure **S2**). As carotenoid deprivation  
171 reduces the overall sensitivity of the photoreceptor by chromophore depletion, flies must  
172 be tested at a higher light intensity. As such, due to the limit of light in the system, flies  
173 were tested at the lower end of the VlogI curve. To simulate these potential confounding  
174 conditions, we tested Rh6 rescue flies raised on a regular diet, at 0.5 log units of light above  
175 and below the normal testing intensity. Spectral responses were relatively unchanged by  
176 light intensity with minor broadening and narrowing of the spectral curve occurring at

177 higher and lower light intensities, respectively (**Fig. 5c**). Importantly however, the spectral  
178 shape of carotenoid-deprived Rh6 rescue flies could not be replicated.

179

### 180 **Double opsin rescues**

181

182 To test for potential spectral modulation at the photoreceptor level, responses from flies  
183 with two active photoreceptor types (double opsin rescue flies) were compared with the  
184 sum of corresponding single photoreceptors. We found no difference in spectral shape  
185 when doubles were tested at different intensities, according to the two VlogI tests carried  
186 out at each visual pigment peak sensitivity, with the exception of a single wavelength in the  
187 Rh3 and Rh5 double rescue flies (Supplementary Figure **S3**). If there were interactions  
188 between photoreceptors we would expect the sum of the single receptors to differ from  
189 that of the double rescue. For R7 and R8 receptor pairs both in their corresponding  
190 ommatidial pairs (e.g. Rh3 and Rh5: R7p and R8p) and in non-corresponding ommatidial  
191 pairs (e.g. Rh4 and Rh6: R7p and R8y) showed highly similar responses to the sum of the  
192 single rescues with the exception of the Rh3 and Rh6 double rescue (**Fig. 5a**). Although a  
193 clear difference in spectral profile can be seen between the expected sum of Rh3 and Rh6  
194 and the corresponding double opsin rescue (**Fig. 6a**), this difference is no longer present in  
195 the non-normalised data (Supplementary Figure **S4**). The sum of the Rh3 and Rh6 spectral  
196 responses do closely match those of the double rescue flies (Rh3 and Rh6) but only when  
197 tested at the intensity calculated from the VlogI experiment at the corresponding peak  
198 (Supplementary Figure **S4**).

199

200

201 Significant differences in spectral shape between the expected sum of single photoreceptor  
202 responses and double opsin rescues between inner and outer receptors were observed for  
203 outer receptors in combination with Rh4, Rh5 and Rh6 (**Fig. 6b**). In all three cases, the  
204 observed shift in the sensitivity curve is due to a lower than expected response in the UV,  
205 which translates to a relatively higher response at wavelengths higher than 400 nm, upon  
206 normalization (Supplementary Figure **S4**). The sum of all mean responses from each  
207 photoreceptor type matches well to the response measured from wild-type flies

208 (Supplementary Figure S5), indicating that the photoreceptor responses do indeed sum  
209 linearly overall.

210

## 211 Discussion

212

213 We have shown that using norpA flies with activity rescued in selected photoreceptor types  
214 alongside ERG enabled the characterisation of spectral sensitivity in *D. melanogaster* as an  
215 alternative to intracellular recordings. The responses of inner R7 receptors are similar to  
216 their respective visual pigments Rh3 and Rh4<sup>4</sup> but have significant changes induced by  
217 ocular screening and filtering pigments. The spectral profiles of R8 inner receptors are even  
218 more notably modified by the presence of ocular pigments and are poorly described by the  
219 underlying visual pigment sensitivities of Rh5 and Rh6<sup>4</sup>. The shift in sensitivity of Rh5 rescue  
220 flies when screening pigment levels were reduced is likely due to the increase in off-axis  
221 light, which increases direct stimulation of the R8p receptor. The resulting sensitivity curve  
222 more closely resembles the underlying sensitivity of the visual pigment<sup>4</sup>. This indicates that  
223 the broadening of sensitivity that we observe is likely due to distal screening from the UV-  
224 receptor R7p.

225

226 The sensitivity curve of Rh6 rescue flies (R8y) with wild-type (red) screening pigment is far  
227 broader than expected, with low levels of sensitivity in the UV and a major peak of  
228 sensitivity at 600 nm (Fig. 5a). This long-wavelength shift of 92 nm from 508 to 600 nm can  
229 be in part explained by the absorption curve of the red screening pigment, which is maximal  
230 at 290 and 525 nm<sup>16</sup> (Fig. 1e). Above 525 nm there is a steady decline in light absorption by  
231 the screening pigment. This has the effect of increasing the light available to the R8y  
232 receptors above 525 nm, where it is still able to stimulate the long-wavelength tail of the  
233 Rh6 visual pigment. This effect can be seen by the hypsochromic (short-wave) shift in peak  
234 sensitivity of the reduced screening pigment mutants back towards the peak sensitivity of  
235 the Rh6 visual pigment to 555 nm (Fig. 5a). By reducing the effect of the long-wavelength  
236 light leakage, the relative absorption of the Rh6 is shifted towards the peak sensitivity of the  
237 underlying visual pigment. We are confident that the peak sensitivity of Rh6 in *Drosophila* is



238 indeed close to the previously measured 508 nm as confirmed by our measurements of  
239 white eye flies with ectopic expression of Rh6 in the outer receptors (Fig. 5a). However,  
240 there is a clear effect of light leakage on the sensitivity of the R8y receptor that shifts  
241 sensitivity towards the red.

242

243 It has been proposed that the Rh1 and Rh6 of *Drosophila* and other red-eyed flies may be  
244 sensitive to the longer wavelengths of light that leak through the red screening pigment and  
245 as a consequence this would degrade spatial resolution<sup>17</sup>. At high light levels, the pupil  
246 response causes increased absorption of blue-green wavelengths, reducing the stimulation  
247 of the Rh1 visual pigment, instead favouring UV-sensitivity and photoconversion of  
248 metarhodopsin<sup>18</sup>. This may reduce absorption of stray long-wavelength light by the Rh1  
249 visual pigment but no such mechanism is present for Rh6. Interestingly, while it is assumed  
250 that stray red light will negatively affect the spatial resolution of fly vision at long  
251 wavelengths, the relative absorption of the red screening pigment is near equal at both 400  
252 and 600 nm. This suggests that the effects of off-axis light stimulation and scatter within the  
253 eye would serve to degrade spatial resolution at both wavelengths similarly.

254

255 Like other large dipterans, *Drosophila* has a blue absorbing carotenoid present in the distal  
256 R7y retinula cells<sup>5</sup>. In *Musca* and *Calliphora* this serves to reduce the light absorbed by the  
257 blue-sensitive visual pigment in R7y, instead conferring sensitivity to the UV by the presence  
258 of a UV-sensitising pigment<sup>19,20</sup>. This interesting and complex system is not found in  
259 *Drosophila*, rather UV-sensitivity is achieved simply by the presence of a dedicated UV-  
260 sensitive visual pigment Rh4<sup>3</sup>. However, the presence of this carotenoid pigment in  
261 *Drosophila* was not previously understood and its effect on R8y has not been tested until  
262 now. When carotenoids were removed from the diet of flies with rescued R8y activity,  
263 sensitivity was restored close to the peak of the visual pigment (510 nm) but some effect of  
264 light leakage remained at 600 nm. This would suggest that the blue-absorbing filter reduces  
265 light available to Rh6 at its peak sensitivity (508 nm) and instead extends sensitivity towards  
266 the red. These findings could not be replicated by simulating the differences in experimental  
267 conditions, either reducing or increasing testing intensity. One generation was sufficient to  
268 remove the contribution of the Rh1 UV-sensitising pigment and further generations of

269 carotenoid deprivation did not change the response curve of Rh6 flies (Supplementary  
270 Figure S2), indicating that any carotenoid filters had been fully removed by one generation.

271

272 The effect of the carotenoid filter can also be seen in the Rh4 rescue flies, where it is  
273 located. When removed, sensitivity is increased at wavelengths greater than 400 nm  
274 suggesting that this filter narrows sensitivity in the UV, potentially increasing wavelength  
275 discrimination in that region of the spectrum. We suggest that this filter both contributes to  
276 refining the sensitivity of the UV-sensitive R7y (Rh4) photoreceptor and bathochromically  
277 shifting the sensitivity of R8y cells by depleting wavelengths of light between 400 and 540  
278 nm in the R7y receptor. In large flies, the yellow filter only shifts R8y sensitivity from 520 to  
279 540 nm but it is not known whether the filter in *Drosophila* absorbs at longer wavelengths,  
280 which could explain the larger shift we observe. Unfortunately the absorption properties of  
281 this carotenoid filter are currently only available for *Musca*<sup>5,21</sup>.

282

283 Our findings suggest that at the level of the photoreceptor, there is no detectable  
284 interaction between inner R7/R8 receptor pairs, or inhibition, which has been detected  
285 further downstream in the visual pathway at the first visual synapse in the medulla and *via*  
286 the Dm9 pathway<sup>1,2</sup>. This strongly suggests that there is no direct enhancement or inhibition  
287 of signal, which could be achieved by gap junctions between neighbouring photoreceptors  
288 or by local electrical fields in the surrounding extracellular space. Furthermore, although  
289 spectral inhibition occurs between photoreceptor terminals in the medulla<sup>1,2</sup> it is not  
290 detectable upstream in *Drosophila*. If such inhibitory processes typically originate at the  
291 terminals and further downstream in other insects, then this may explain why so few  
292 studies have described spectral inhibition using intracellular recordings alone. Our results  
293 provide evidence for interactions between outer and inner receptors, which may indicate a  
294 feedback pathway in the lamina, where both inner and outer receptors interact. Cross-  
295 modulation *via* gap junctions in the lamina is known to occur between the Rh1-mediated  
296 motion pathway and R7/R8 colour pathway<sup>22,23</sup> and was proposed as a mechanism to  
297 improve motion discrimination<sup>13</sup>. We suggest that our findings provide further evidence to  
298 support this circuit model. The addition of responses from all single rescue genotypes is in  
299 good agreement with wild type responses, demonstrating that overall, the voltage output of  
300 the photoreceptors sum linearly at the level of the retina (Supplementary Figure S5).

301

302 Our experiments show the importance of *in vivo* measurements for the full characterisation  
303 of visual systems that take into account the modulating effects of screening from distal  
304 receptors and ocular pigments. We found that the response of R8y receptor is strongly  
305 bathochromically shifted by both the presence of screening pigment and the blue-absorbing  
306 yellow filter. The latter also plays a role in refining the sensitivity of the Rh4 UV-sensitive  
307 visual pigment, which would likely enhance spectral discrimination. These findings  
308 contribute to the greater understanding of the *Drosophila* visual system and will assist in  
309 guiding future visual experiments and visual system modelling for which it is vital that the  
310 underlying photoreceptor sensitivity is known.

## 311 Methods

### 312 Animals

313

314 All *Drosophila melanogaster* stocks were maintained on 12/12 h light/dark light cycle at  
315 22°C. Flies were reared on either yellow cornmeal or yeast-glucose food, for tests of  
316 carotenoid deprivation. Photoreceptor activity was selectively recovered by expression of  
317 phospholipase C (PLC) under opsin promoters against a *norpA* background, generating single  
318 opsin rescue flies. Opsin rescue flies were generated with wild-type screening pigment (red  
319 eye), (*w[+] norpA.CS; Rh-norpA*) and reduced screening pigment (orange eye), by  
320 incorporation of the *mini-white* gene, *w[-] norpA; Rh-norpA*. Single rescue flies were crossed  
321 to generate double opsin rescue genotypes. Rh6 opsin was ectopically expressed in the  
322 outer receptors under the control of the Rh1 promoter in a white eye mutant background,  
323 *w[-] norpA; Rh1-norpA Rh1-Rh6; ninaE*. Oregon R flies were used to test wild-type response  
324 and a *norpA* mutant with no rescue used as a negative control, *w[-] norpA;+;+*  
325 (Supplementary Figure S6).

326

### 327 Light stimulus

328

329 Light from a 150W xenon arc lamp was coupled to a monochromator with either 1200 or  
330 2400 line-ruled diffraction grating. Long-pass filters were placed in the light path to filter  
331 optical harmonics produced by the 1200 grating (< 250 nm, WG280, Schott) and 2400  
332 grating (< 400 nm, GG435, Schott). Intensity of the light was controlled by altering the width  
333 of the input and exit slits of the monochromator. Peak wavelength was controlled by the  
334 grating angle, yielding a testing range between 315 – 550 nm or 450 – 700 nm for the 1200  
335 and 2400 gratings, respectively. Wavelength and photon flux were calibrated at the point of  
336 the fly. All spectral measurements were made using spectrophotometers (Avantes AvaSpec  
337 2048 Single Channel spectrometer and Ocean FX, OceanOptics) calibrated to a known light  
338 source for measurements of irradiance (DH2000, OceanOptics). Spectral acquisition was  
339 controlled using custom Matlab scripts (v2018a, Mathworks) and conversions to irradiance  
340 were carried out according to the manufacturer's instructions. Irradiance in  $\mu\text{Watt cm}^{-2}$  was  
341 converted to photon flux in  $\text{photons}^{-1}\text{m}^{-2}\text{s}^{-1}$  according to the equation:

342

343

$$Photon\ flux = \frac{I \cdot 10^{-10} \cdot \lambda \cdot 10^{-9}}{(h \cdot c)}$$

344

345

346 where  $I$  is irradiance,  $h$  is Planck's constant,  $c$  is the speed of light and  $\lambda$  is wavelength. A  
347 measure of total photon flux was calculated by integrating underneath the spectrum curve,  
348 which was used for all calibrations. To ensure isoquantal stimuli at each desired wavelength  
349 and intensity, we ran an automated calibration protocol using custom Matlab scripts (Data  
350 Acquisition Toolbox, Mathworks), which simultaneously controlled the spectrophotometer  
351 and monochromator. The position of entrance and exit slits of the monochromator and the  
352 diffraction grating were incrementally adjusted until the desired peak wavelength and total  
353 photon flux was reached. Each stimulus was calibrated to within +/- 0.5 nm peak  
354 wavelength, calculated using full width of spectrum at half maximum and to within +/-  
355 0.75% total photon flux. All stimuli were then measured with the calibrated values to  
356 confirm calibration stability (Supplementary Figures **S7** and **S8**). Orange eye Rh1 and Rh5  
357 rescue flies were illuminated with background light (670 nm) to increase recovery of  
358 sensitivity according to preliminary testing.

359

## 360 **ERG**

361

362 Animals were anaesthetised on ice and immobilised on a metal cone using ultraviolet curing  
363 adhesive (Norland). Electroretinogram (ERG) recordings were made using borosilicate  
364 micropipettes filled with insect saline. Recordings were measured from the equator of the  
365 eye and the reference electrode was positioned in the median ocellus. Light was delivered  
366 to the fly via a UV transmissive 5 mm liquid light guide and silica bi-convex lens with 25.4  
367 mm focal length (Newport SBX019, USA), arranged to maximise light stimulation at the  
368 point of the fly. All recordings were made within a Faraday cage and responses were  
369 amplified (MultiClamp 700B amplifier, Molecular devices or EXT-02F, NPI). Both stimuli and  
370 data acquisition were controlled using a DAQ board (National Instruments) in conjunction  
371 with the software, Ephus<sup>24</sup>.

372

## 373 **Experimental design**

374

375 To determine the response-log intensity (VlogI) function, each animal was tested with a  
376 series of 200 ms light pulses every 10 seconds that increased in intensity over a possible  
377 range of 6 log units. Red eye flies were tested between  $1.14 \times 10^7$  and  $3.60 \times 10^{12}$  photons $^{-1}$   
378  $m^{-2}s^{-1}$ . Orange eye flies were tested between  $3.60 \times 10^6$  and  $6.40 \times 10^{11}$  photons $^{-1}m^{-2}s^{-1}$ .  
379 Each intensity was repeated 10 times followed by a pause of 100 seconds. The wavelength  
380 each VlogI test was chosen according to previous estimates of peak sensitivity for the test  
381 visual pigment: Rh1, 485 nm; Rh3, 345 nm; Rh4, 370 nm; Rh5, 440 nm; Rh6 540 nm<sup>4</sup>. Peak  
382 wavelength for Rh6 was adjusted after preliminary tests indicated longer-wavelength peak  
383 sensitivity. The intensity at half maximum response was calculated from the VlogI curve and  
384 used for spectral tests. In cases where no obvious photoreceptor saturation had occurred,  
385 this value was estimated from the fitted curve.

386

387 To test spectral response, animals were stimulated with isoquantal flashes every 5 seconds  
388 at all test wavelengths with randomised presentation. Test wavelengths were divided into  
389 three blocks from lowest to highest wavelength and randomised within. Stimuli were always  
390 presented from these categories in order from low to high, to ensure a balanced order of  
391 testing across the wavelength range. Each wavelength was tested 10 times concurrently and  
392 the last 5 responses were used for analysis. All genotypes were tested with wavelengths of  
393 315 – 550 nm and those with long wavelength responses (e.g. Rh6) were also tested with  
394 450 – 700 nm, in steps of 5 nm. All animals were dark adapted for 30 minutes prior to the  
395 VlogI test and subsequently a further 15 minutes before each spectral sensitivity test.

396

## 397 **Analysis**

398

399 ERG responses were normalised to a zero baseline using the average of 100 ms prior to  
400 stimulus onset. Photoreceptor response was calculated as the change in voltage between  
401 the zero baseline and minimum voltage during the 10 ms before the end of the light flash.  
402 The last 5 photoreceptor responses from each set of 10 repeats was used for VlogI and  
403 spectral sensitivity tests. These responses were averaged and mean responses used to  
404 compare genotypes. Animals with low or noisy ERG responses indicating a poor-quality

405 preparation or inadequate electrode connection were not used for further analysis. VlogI  
406 data were fitted to the Naka-Rushton function:

407

$$408 \quad \frac{V}{V_{max}} = \frac{I^n}{I^n + K^n}$$

409

410 where  $V$  is the photoreceptor response,  $V_{max}$  is the maximum response,  $I$  is the light  
411 intensity and  $K$  is the light intensity required to achieve half of  $V_{max}$ <sup>25</sup> and  $n$  is the slope.  
412 The intensity at half maximum response ( $K$ ) was used for spectral tests. Spectral sensitivity  
413 data were first smoothed using a Savitzky-Golay filter (data window 15 nm) then averaged  
414 across the normalised data from all individuals in each experiment. To combine spectral  
415 sensitivity curves from tests using both the lower and higher wavelength gratings all non-  
416 normalised curves were joined at the 450 – 550 nm overlap region and an average fit was  
417 derived from the fit of all 21 points. The joined curves were then normalized between 0 and  
418 1 and analysed as outlined previously. For a comparison of photoreceptor pair responses,  
419 the mean of non-normalised sensitivity curves from single rescue flies were summed pair-  
420 wise according to the order of light stimulus and compared with the response curves of  
421 double rescue flies. All analyses were performed in MATLAB (v2018b, Mathworks), using  
422 custom scripts. Visual pigment templates were generated using R package PAVO<sup>26</sup>. Two  
423 sample Student's t-tests were carried out with Bonferroni correction for multiple sampling  
424 between sensitivity curves with the exception of comparisons made between double opsin  
425 rescues tested at different light intensities, which were tested using paired t-tests. All  
426 statistical tests were carried out in R<sup>27</sup>.

427

#### 428 **Acknowledgements**

429 We thank Cairn Research (in particular Jeremy Graham) for assistance with customisation of  
430 the optoscan monochromator and the University of Cambridge fabrication workshops. We  
431 also thank Ilse Daly and Nicholas Roberts for their assistance with spectrophotometer  
432 calibrations.

433

#### 434 **Author contributions**

435 CRS collected, analysed, interpreted data and wrote the manuscript. JB generated  
436 transgenic flies. MML and DPB collected ERG data. TW conceived the study and assisted  
437 with data interpretation. CRS, JB and TW edited the manuscript.

438

#### 439 **Funding**

440 We thank the Biotechnology and Biological Sciences Research Council (BBSRC) for a David  
441 Phillips Fellowship to support TJW (BB/L024667/1) and the College of Biological Sciences,  
442 University of Minnesota.

443

#### 444 **Competing interests**

445

446 The authors declare no competing interests.

447

#### 448 **References**

449

- 450 1. Schnaitmann, C. *et al.* Color processing in the early visual system of *Drosophila*. *Cell*  
451 **172**, 318–330 (2018).
- 452 2. Heath, S. L. *et al.* Circuit Mechanisms Underlying Chromatic Encoding in *Drosophila*  
453 Photoreceptors. *Curr. Biol.* **30**, 264–275 (2020).
- 454 3. Feiler, R. *et al.* Ectopic expression of ultraviolet-rhodopsins in the blue photoreceptor  
455 cells of *Drosophila*: visual physiology and photochemistry of transgenic animals. *J.*  
456 *Neurosci.* **12**, 3862–3868 (1992).
- 457 4. Salcedo, E. *et al.* Blue- and green-absorbing visual pigments of *Drosophila*: ectopic  
458 expression and physiological characterization of the R8 photoreceptor cell-specific  
459 Rh5 and Rh6 rhodopsins. *J. Neurosci.* **19**, 10716–10726 (1999).
- 460 5. Kirschfeld, K., Feiler, R. & Franceschini, N. A photostable pigment within the  
461 rhabdomere of fly photoreceptors No.7. *J. Comp. Physiol. A* **125**, 275–284 (1978).
- 462 6. Kirschfeld, K., Franceschini, N. & Minke, B. Evidence for a sensitising pigment in fly  
463 photoreceptors. *Nature* **269**, 386–390 (1977).
- 464 7. Stavenga, D. G., Zantema, A. & Kuiper, J. W. Rhodopsin processes and the function of  
465 the pupil mechanism in flies. in *Biochemistry and Physiology of Visual Pigments* (ed.  
466 Langer, H.) 175–180 (Springer- Verlag, Heidelber, 1973).



- 467 8. Autrum, H. & Stumpf, H. Elektrophysiologische Untersuchungen über das  
468 Farbsehen von *Calliphora*. *Z. Vgl. Physiol.* **35**, 71–104 (1953).
- 469 9. Goldsmith, T. H. Do Flies Have A Red Receptor? *J. Gen. Physiol.* **49**, 265–287 (1965).
- 470 10. Schnaitmann, C., Garbers, C., Wachtler, T. & Tanimoto, H. Color discrimination with  
471 broadband photoreceptors. *Curr. Biol.* **23**, 2375–2382 (2013).
- 472 11. Hernández de Salomon, C. & Spatz, H.-C. Colour vision in *Drosophila melanogaster*:  
473 Wavelength discrimination. *J. Comp. Physiol. A* **150**, 31–37 (1983).
- 474 12. Garbers, C. & Wachtler, T. Wavelength discrimination in *Drosophila* suggests a role of  
475 rhodopsin 1 in color vision. *PLoS One* **11**, e0155728 (2016).
- 476 13. Wardill, T. J. *et al.* Multiple spectral inputs improve motion discrimination in the  
477 *Drosophila* visual system. *Science*. **336**, 925–931 (2012).
- 478 14. Chen, P., Arikawa, K. & Yang, E. Diversity of the Photoreceptors and Spectral  
479 Opponency in the Compound Eye of the Golden Birdwing, *Troides aeacus*  
480 *formosanus*. *PLoS One* **8**, e62240 (2013).
- 481 15. Horridge, G. A., Marčelja, L., Jahnke, R. & Matič, T. Single electrode studies on the  
482 retina of the butterfly *Papilio*. *J. Comp. Physiol. A* **150**, 271–294 (1983).
- 483 16. Strother, G. K. & Casella, A. J. Microspectrophotometry of arthropod visual screening  
484 pigments. *J. Gen. Physiol.* **59**, 616–636 (1972).
- 485 17. Stavenga, D. G., Wehling, M. F. & Belušič, G. Functional interplay of visual, sensitizing  
486 and screening pigments in the eyes of *Drosophila* and other red-eyed dipteran flies. *J.*  
487 *Physiol.* **595**, 5481–5494 (2017).
- 488 18. Stavenga, D. G. Visual acuity of fly photoreceptors in natural conditions - dependence  
489 on UV sensitizing pigment and light-controlling pupil. *J. Exp. Biol.* **207**, 1703–1713  
490 (2004).
- 491 19. Hardie, R. C. & Kirschfeld, K. Ultraviolet sensitivity of fly photoreceptors R7 and R8:  
492 Evidence for a sensitising function. *Biophys. Struct. Mech.* **9**, 171–180 (1983).
- 493 20. Kirschfeld, K., Hardie, R., Lenz, G. & Vogt, K. The pigment system of the photoreceptor  
494 7 yellow in the fly, a complex photoreceptor. *J. Comp. Physiol. A* **162**, 421–433 (1988).
- 495 21. McIntyre, P. & Kirschfeld, K. Absorption properties of a photostable pigment (P456) in  
496 rhabdomere 7 of the fly. *J. Comp. Physiol. A* **143**, 3–15 (1981).
- 497 22. Shaw, S. R., Fröhlich, A. & Meinertzhagen, I. A. Direct connections between the R7/8  
498 and R1-6 photoreceptor subsystems in the dipteran visual system. *Cell Tissue Res.*

- 499           **257**, 295–302 (1989).
- 500   23.   Shaw, S. R. Early visual processing in insects. *J. Exp. Biol.* **112**, 225–251 (1984).
- 501   24.   Suter, B. A. *et al.* Ephus: multipurpose data acquisition software for neuroscience  
502        experiments. *Front. Neural Circuits* **4**, 1–12 (2010).
- 503   25.   Naka, K. I. & Rushton, W. A. H. An attempt to analyse colour reception. *J. Physiol.* **185**,  
504        556–586 (1966).
- 505   26.   Maia, R., Eliason, C. M., Bitton, P. P., Doucet, S. M. & Shawkey, M. D. pavo: An R  
506        package for the analysis, visualization and organization of spectral data. *Methods*  
507        *Ecol. Evol.* **4**, 906–913 (2013).
- 508   27.   R Core Team. R: A Language and Environment for Statistical Computing. (2013).
- 509   28.   Stavenga, D. G. Angular and spectral sensitivity of fly photoreceptors . III .  
510        Dependence on the pupil mechanism in the blowfly *Calliphora*. *J. Comp. Physiol. A*  
511        **190**, 115–129 (2004).
- 512   29.   Govardovskii, V. I., Fyhrquist, N., Reuter, T., Kuzmin, D. G. & Donner, K. In search of  
513        the visual pigment template. *Vis. Neurosci.* **17**, 509–528 (2000).
- 514
- 515
- 516
- 517
- 518
- 519
- 520
- 521
- 522
- 523
- 524
- 525
- 526
- 527
- 528
- 529
- 530

531 **Figures**

532

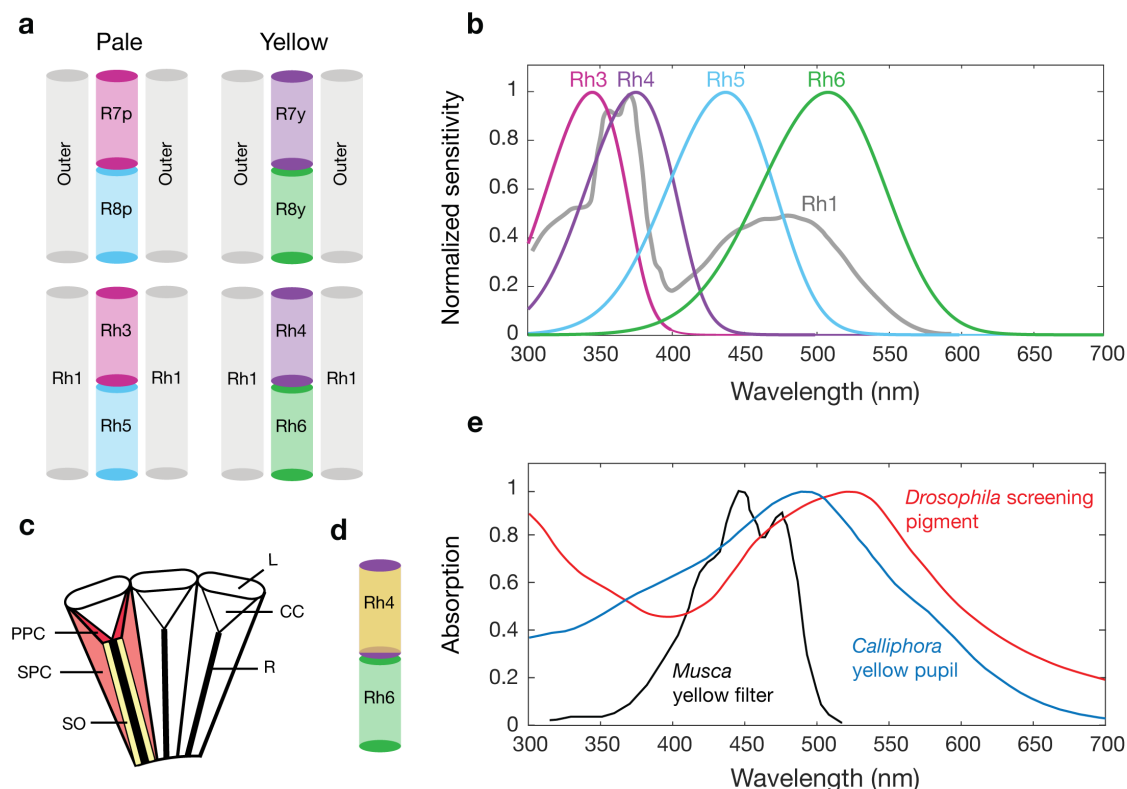

533

534 **Figure 1.** An overview of *Drosophila* photoreceptors, visual pigments and fly ocular  
 535 pigments. (a) The arrangement of inner R7/R8 and outer receptors in pale- and yellow-type  
 536 ommatidia of *Drosophila* and the opsins expressed in each. (b) Spectral sensitivities of visual  
 537 pigments Rh3 – 6 modelled using visual pigment templates and previous sensitivity  
 538 estimates<sup>4</sup>. Rh1 has a characteristic shape owing to a blue-green sensitive visual pigment  
 539 coupled to a UV-sensitising pigment. (c) Longitudinal section diagram of an insect compound  
 540 eye indicating the distribution of screening pigment in primary pigment cells (PPC) and  
 541 secondary pigment cells (SPC) that optically isolate the corneal lens (L), crystalline cone (CC)  
 542 and rhabdom (R). The soma (SO) of the photoreceptors contain mobile pigment granules  
 543 that form the fly pupil. (d) Location of the blue-absorbing yellow filter alongside opsin Rh4 in  
 544 the R7y rhabdom. (e) Absorption of red *Drosophila* screening pigment, *Calliphora* yellow  
 545 pupillary pigment and the blue-absorbing yellow filter measured in *Musca*<sup>5,16,28</sup>.

546

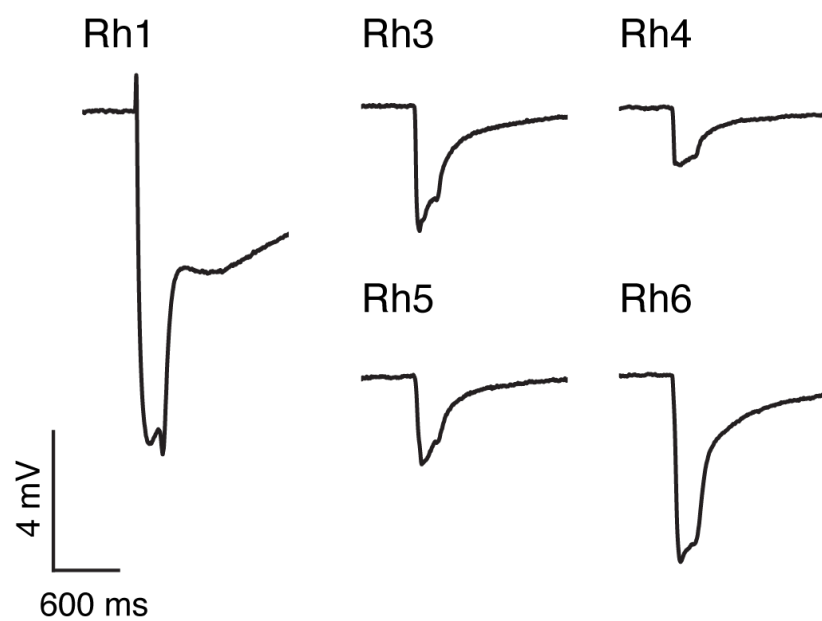

547

548

549 **Figure 2.** Example ERG traces of single opsin rescue flies in response to a 200 ms pulse of

550 light at photoreceptor saturation ( $3.60 \times 10^{12} \text{ photons}^{-1} \text{ m}^{-2} \text{ s}^{-1}$ ).

551

552

553

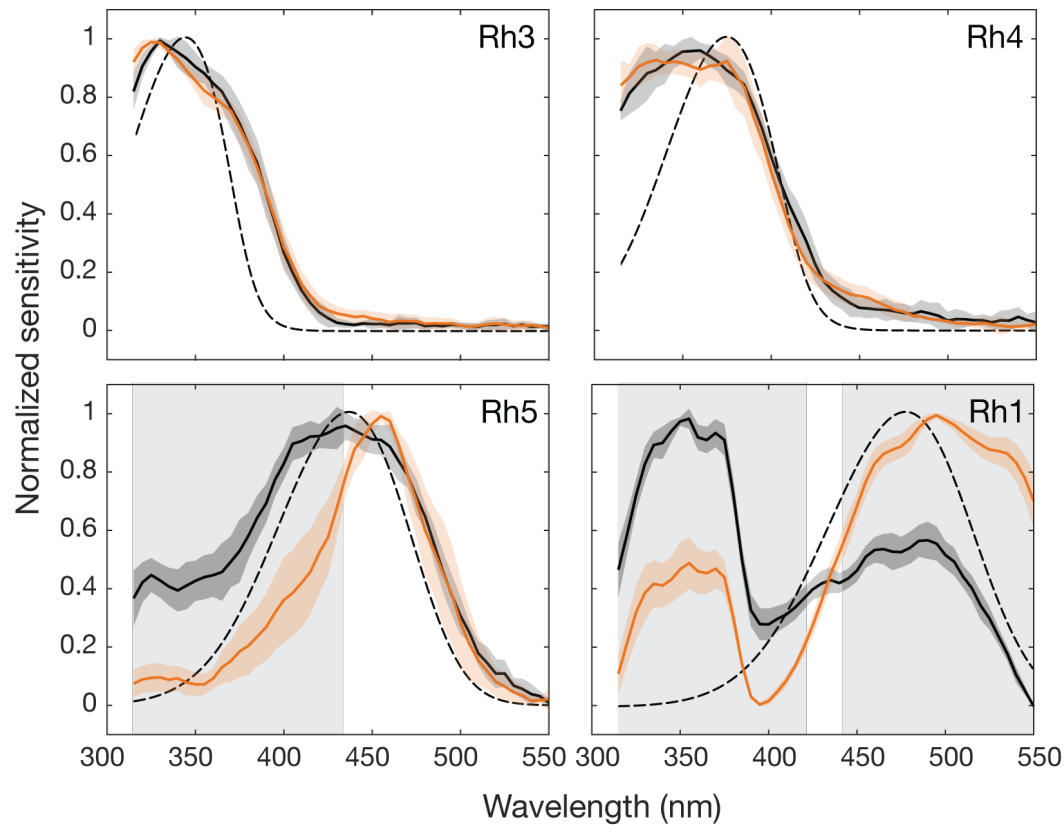

554

555

556 **Figure 3.** Spectral sensitivity of red and orange eye flies with selectively rescued  
557 photoreceptor responses. Normalized spectral sensitivity of red eye (black lines) and orange  
558 eye (orange lines) flies with rescued activity of Rh1, Rh3, Rh4 or Rh5. Modelled visual  
559 pigment templates (dashed lines), based on previous estimates<sup>3,4,29</sup>. Error shown is standard  
560 deviation. Shading denotes significance between red and orange eye flies using a two-  
561 sample Student's t-test at  $p < 0.001$ . For Vlog-I curves, see Supplementary Figure (S1).

562

563

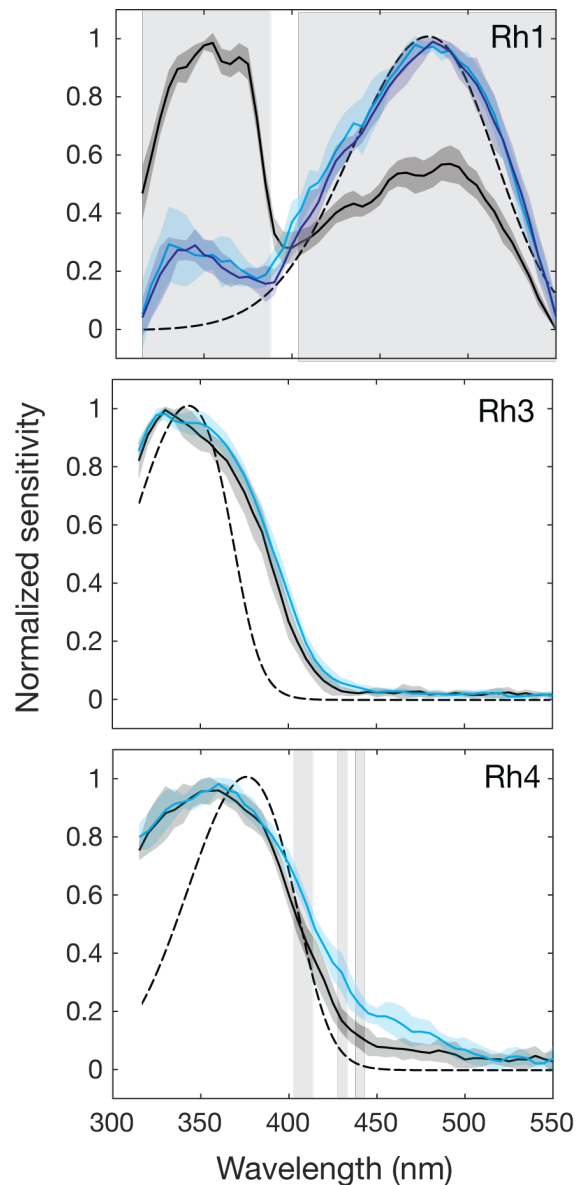

564

565

566 **Figure 4.** Spectral sensitivity of flies with carotenoid deprivation and selectively rescued  
567 photoreceptor responses. Normalized spectral sensitivity of red-eye flies raised on a regular  
568 diet of yellow cornmeal (black) or carotenoid-deprived flies raised on yeast-glucose for one  
569 (light blue) or two (dark blue) generations, in the case of Rh1 flies. Modelled visual pigment  
570 templates (dashed lines) based on previous estimates<sup>3,4,29</sup>. Error shown is standard  
571 deviation. Shading denotes significance between normal and carotenoid-deprived red-eye  
572 flies using a two-sample Student's t-test at  $p < 0.001$ .

573

574

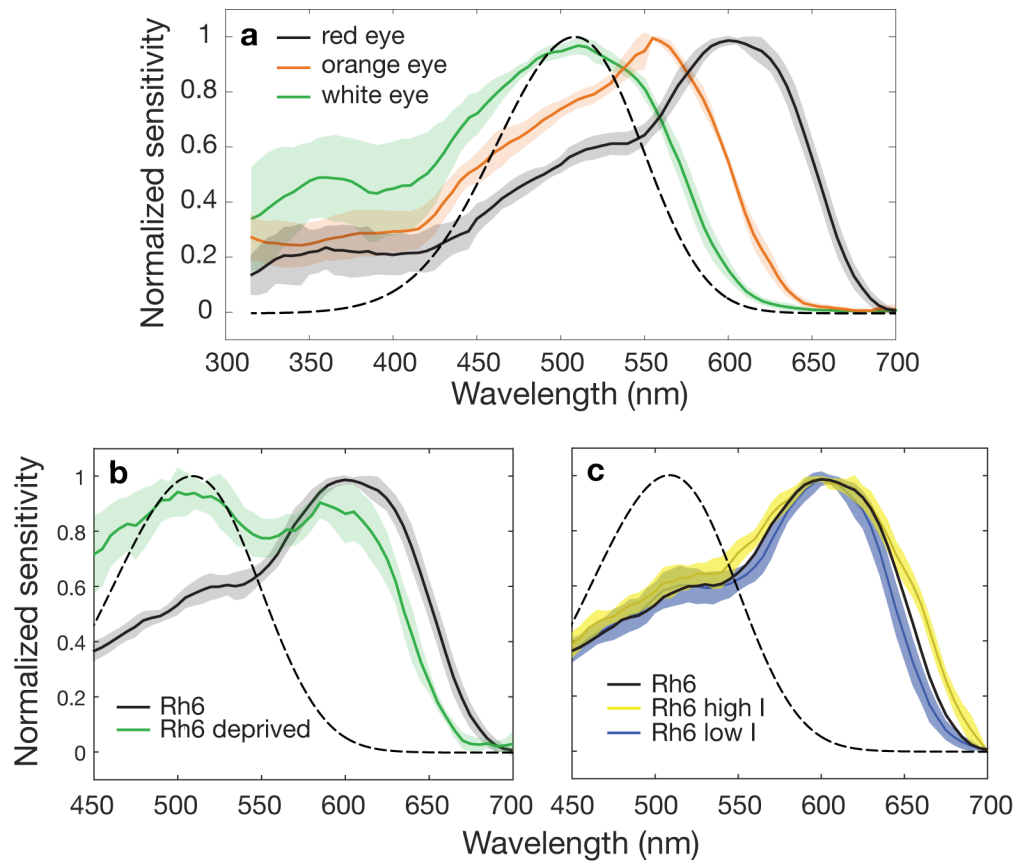

575

576

577 **Figure 5.** The effect of screening pigment, carotenoid deprivation and ectopic expression on  
578 the spectral sensitivity of the Rh6 visual pigment. (a) Normalized spectral sensitivity of Rh6  
579 rescue flies with red- (black solid), orange- (orange) or white eyes with Rh6 expressed in  
580 outer receptors (green), peaking at 600, 555 and 510 nm, respectively. Spectral sensitivity  
581 template of the Rh6 visual pigment peaking at 508 nm (dashed line). (b) Normalised spectral  
582 sensitivity of Rh6 rescue flies with red eyes raised on a regular (black solid line) or  
583 carotenoid-free diet for two generations (green line). (c) Response curves of Rh6 rescue flies  
584 tested 0.5 log units above (high I) and below (low I) normal test intensity. All error shown is  
585 standard deviation.

586

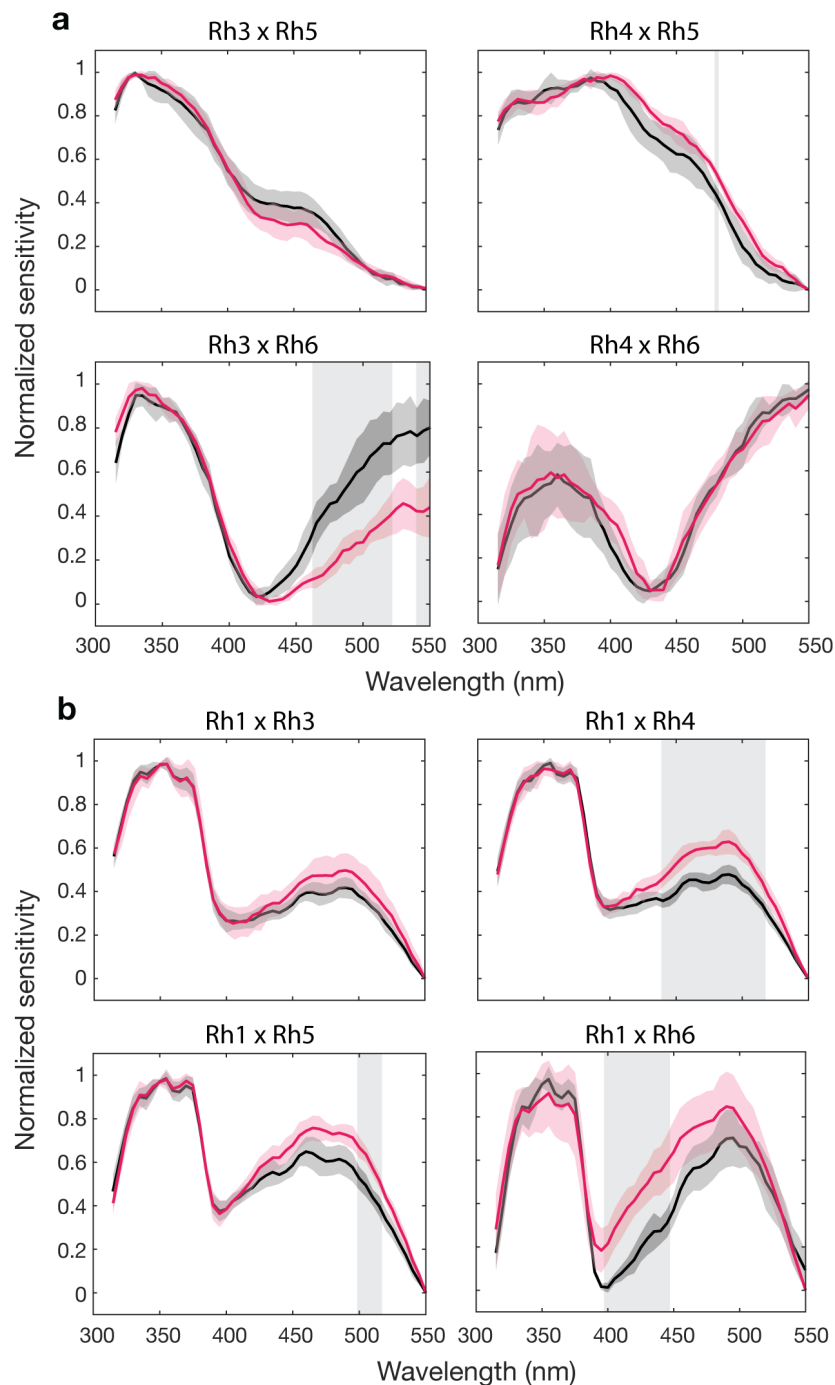

587

588 **Figure 6.** Spectral sensitivity of double opsin rescue flies and the sum of equivalent single  
589 rescue responses. (a) Normalized responses from double opsin rescue flies with the activity  
590 of two photoreceptor types active (pink) compared with the algebraic sum of the single  
591 rescue responses (black). Animals were tested at two intensities, derived from the VlogI  
592 response at Rh3/Rh4 peak sensitivities and Rh5/Rh6 peak sensitivities (not shown, see  
593 Supplementary Figure S3). (b) Double opsin rescue flies with Rh3 – 6 and Rh1 (pink)  
594 compared to the sum of single rescue flies (black). Double rescue flies were tested at  
595 intensities using VlogI responses at the Rh1 peak sensitivity and Rh3/Rh4/Rh5/Rh6 peak



596 *sensitivities (not shown, see Supplementary Figure S3). All error shown is standard deviation.*

597 *Shading denotes significance between double rescue response and sum of singles using a*

598 *two-sample Student's t-test at  $p < 0.001$ .*

599
